# Supplementary material for: Cardiac Computed Tomography Versus Transesophageal Echocardiography for the Detection of Left Atrial Appendage Thrombus: A Systemic Review and Meta‐Analysis
Source: PubMed Central journal article supplement — J Am Heart Assoc. 2021 Nov 19;10(23):e022505. doi: 10.1161/JAHA.121.022505 (PMC9075398; doi:10.1161/jaha.121.022505), 2021-11-19

# **Supplemental Material**

**Table S1. PRISMA-DTA Checklist**

| Section/topic                   | #  | PRISMA-DTA Checklist Item                                                                                                                                                                                                                                                | Reported on Page Number | Reported on Section/Paragraph |
|---------------------------------|----|--------------------------------------------------------------------------------------------------------------------------------------------------------------------------------------------------------------------------------------------------------------------------|-------------------------|-------------------------------|
| <b>TITLE/ABSTRACT</b>           |    |                                                                                                                                                                                                                                                                          |                         |                               |
| Title                           | 1  | Identify the report as a systematic review (+/- meta-analysis) of diagnostic test accuracy (DTA) studies.                                                                                                                                                                | Page 1                  | Title                         |
| Abstract                        | 2  | Abstract: See PRISMA-DTA for abstracts (Table S4).                                                                                                                                                                                                                       | Page2                   | Abstract/ Paragraph 1-3       |
| <b>INTRODUCTION</b>             |    |                                                                                                                                                                                                                                                                          |                         |                               |
| Rationale                       | 3  | Describe the rationale for the review in the context of what is already known.                                                                                                                                                                                           | Page 3                  | Introduction/ Paragraph 1     |
| Clinical role of index test     | D1 | State the scientific and clinical background, including the intended use and clinical role of the index test, and if applicable, the rationale for minimally acceptable test accuracy (or minimum difference in accuracy for comparative design).                        | Page 3                  | Introduction / Paragraph 2    |
| Objectives                      | 4  | Provide an explicit statement of question(s) being addressed in terms of participants, index test(s), and target condition(s).                                                                                                                                           | Page 4                  | Introduction / Paragraph 2    |
| <b>METHODS</b>                  |    |                                                                                                                                                                                                                                                                          |                         |                               |
| Protocol and registration       | 5  | Indicate if a review protocol exists, if and where it can be accessed (e.g., Web address), and, if available, provide registration information including registration number.                                                                                            | Page 2                  | Registration                  |
| Eligibility criteria            | 6  | Specify study characteristics (participants, setting, index test(s), reference standard(s), target condition(s), and study design) and report characteristics (e.g., years considered, language, publication status) used as criteria for eligibility, giving rationale. | Page 4                  | Methods/ Paragraph 3-4        |
| Information sources             | 7  | Describe all information sources (e.g., databases with dates of coverage, contact with study authors to identify additional studies) in the search and date last searched.                                                                                               | Page 4                  | Methods/ Paragraph 3          |
| Search                          | 8  | Present full search strategies for all electronic databases and other sources searched, including any limits used, such that they could be repeated.                                                                                                                     | Page 4                  | Methods/ Paragraph 3          |
| Study selection                 | 9  | State the process for selecting studies (i.e., screening, eligibility, included in systematic review, and, if applicable, included in the meta-analysis).                                                                                                                | Page 4                  | Methods/ Paragraph 4          |
| Data collection process         | 10 | Describe method of data extraction from reports (e.g., piloted forms, independently, in duplicate) and any processes for obtaining and confirming data from investigators.                                                                                               | Page 5                  | Methods/ Paragraph 5          |
| Definitions for data extraction | 11 | Provide definitions used in data extraction and classifications of target condition(s), index test(s), reference standard(s) and other characteristics (e.g. study design, clinical setting).                                                                            | Page 5                  | Methods/ Paragraph 5          |

|                                |    |                                                                                                                                                                                                                                                                                                                                                                                                                                          |          |                         |
|--------------------------------|----|------------------------------------------------------------------------------------------------------------------------------------------------------------------------------------------------------------------------------------------------------------------------------------------------------------------------------------------------------------------------------------------------------------------------------------------|----------|-------------------------|
| Risk of bias and applicability | 12 | Describe methods used for assessing risk of bias in individual studies and concerns regarding the applicability to the review question.                                                                                                                                                                                                                                                                                                  | Page 5   | Methods/ Paragraph 6    |
| Diagnostic accuracy measures   | 13 | State the principal diagnostic accuracy measure(s) reported (e.g. sensitivity, specificity) and state the unit of assessment (e.g. per-patient, per-lesion).                                                                                                                                                                                                                                                                             | Page 5-6 | Methods/ Paragraph 7    |
| Synthesis of results           | 14 | Describe methods of handling data, combining results of studies and describing variability between studies. This could include, but is not limited to: a) handling of multiple definitions of target condition. b) handling of multiple thresholds of test positivity, c) handling multiple index test readers, d) handling of indeterminate test results, e) grouping and comparing tests, f) handling of different reference standards | Page 5-6 | Methods/ Paragraph 7    |
| Meta-analysis                  | D2 | Report the statistical methods used for meta-analyses, if performed.                                                                                                                                                                                                                                                                                                                                                                     | Page 5-6 | Methods/ Paragraph 7    |
| Additional analyses            | 16 | Describe methods of additional analyses (e.g., sensitivity or subgroup analyses, meta-regression), if done, indicating which were pre-specified.                                                                                                                                                                                                                                                                                         | Page 5-6 | Methods/ Paragraph 7    |
| <b>RESULTS</b>                 |    |                                                                                                                                                                                                                                                                                                                                                                                                                                          |          |                         |
| Study selection                | 17 | Provide numbers of studies screened, assessed for eligibility, included in the review (and included in meta-analysis, if applicable) with reasons for exclusions at each stage, ideally with a flow diagram.                                                                                                                                                                                                                             | Page 6   | Results/ Paragraph 1    |
| Study characteristics          | 18 | For each included study provide citations and present key characteristics including: a) participant characteristics (presentation, prior testing), b) clinical setting, c) study design, d) target condition definition, e) index test, f) reference standard, g) sample size, h) funding sources                                                                                                                                        | Page 6-7 | Results/ Paragraph 2    |
| Risk of bias and applicability | 19 | Present evaluation of risk of bias and concerns regarding applicability for each study.                                                                                                                                                                                                                                                                                                                                                  | Page 7   | Results/ Paragraph 3    |
| Results of individual studies  | 20 | For each analysis in each study (e.g. unique combination of index test, reference standard, and positivity threshold) report 2x2 data (TP, FP, FN, TN) with estimates of diagnostic accuracy and confidence intervals, ideally with a forest or receiver operator characteristic (ROC) plot.                                                                                                                                             | Page 6   | Results/ Paragraph 1    |
| Synthesis of results           | 21 | Describe test accuracy, including variability; if meta-analysis was done, include results and confidence intervals.                                                                                                                                                                                                                                                                                                                      | Page 7-8 | Results/ Paragraph 4-6  |
| Additional analysis            | 23 | Give results of additional analyses, if done (e.g., sensitivity or subgroup analyses, meta-regression; analysis of index test: failure rates, proportion of inconclusive results, adverse events).                                                                                                                                                                                                                                       | Page 7-8 | Results/ Paragraph 7-8  |
| <b>DISCUSSION</b>              |    |                                                                                                                                                                                                                                                                                                                                                                                                                                          |          |                         |
| Summary of evidence            | 24 | Summarize the main findings including the strength of evidence.                                                                                                                                                                                                                                                                                                                                                                          | Page 9   | Discussion/ Paragraph 1 |
| Limitations                    | 25 | Discuss limitations from included studies (e.g. risk of bias and concerns regarding applicability) and from the review process (e.g. incomplete retrieval of identified research).                                                                                                                                                                                                                                                       | Page 10  | Discussion/ Paragraph 2 |

|                |    |                                                                                                                                                                                                               |         |            |
|----------------|----|---------------------------------------------------------------------------------------------------------------------------------------------------------------------------------------------------------------|---------|------------|
| Conclusions    | 26 | Provide a general interpretation of the results in the context of other evidence. Discuss implications for future research and clinical practice (e.g. the intended use and clinical role of the index test). | Page 11 | Conclusion |
| <b>FUNDING</b> |    |                                                                                                                                                                                                               |         |            |
| Funding        | 27 | For the systematic review, describe the sources of funding and other support and the role of the funders.                                                                                                     | Page 11 | Funding    |

Adapted From: McInnes MDF, Moher D, Thoms BD, McGrath TA, Bossuyt PM, The PRISMA-DTA Group (2018). Preferred Reporting Items for a Systematic Review and Meta-analysis of Diagnostic Test Accuracy Studies: The PRISMA-DTA Statement. JAMA. 2018 Jan 23;319(4):388-396. doi: 10.1001/jama.2017.19163.

**Table S2. PRISMA-DTA for Abstracts Checklist**

| Section/topic                | #  | PRISMA-DTA Checklist Item                                                                                                                                                                                                                             | Reported on Page Number | Reported on Section/Paragraph |
|------------------------------|----|-------------------------------------------------------------------------------------------------------------------------------------------------------------------------------------------------------------------------------------------------------|-------------------------|-------------------------------|
| <b>TITLE and PURPOSE</b>     |    |                                                                                                                                                                                                                                                       |                         |                               |
| Title                        | 1  | Identify the report as a systematic review (+/- meta-analysis) of diagnostic test accuracy (DTA) studies.                                                                                                                                             | Page 1                  | Title                         |
| Objectives                   | 2  | Indicate the research question, including components such as participants, index test, and target conditions.                                                                                                                                         | Page2                   | Abstract/ Paragraph 1         |
| <b>METHODS</b>               |    |                                                                                                                                                                                                                                                       |                         |                               |
| Eligibility criteria         | 3  | Include study characteristics used as criteria for eligibility.                                                                                                                                                                                       | Page2                   | Abstract/ Paragraph 2         |
| Information sources          | 4  | List the key databases searched and the search dates.                                                                                                                                                                                                 | Page2                   | Abstract/ Paragraph 2         |
| Risk of bias & applicability | 5  | Indicate the methods of assessing risk of bias and applicability.                                                                                                                                                                                     | Page2                   | Abstract/ Paragraph 2         |
| Synthesis of results         | A1 | Indicate the methods for the data synthesis.                                                                                                                                                                                                          | Page2                   | Abstract/ Paragraph 2         |
| <b>RESULTS</b>               |    |                                                                                                                                                                                                                                                       |                         |                               |
| Included studies             | 6  | Indicate the number and type of included studies and the participants and relevant characteristics of the studies (including the reference standard).                                                                                                 | Page2                   | Abstract/ Paragraph 2         |
| Synthesis of results         | 7  | Include the results for the analysis of diagnostic accuracy, preferably indicating the number of studies and participants. Describe test accuracy including variability; if meta-analysis was done, include summary results and confidence intervals. | Page2                   | Abstract/ Paragraph 2         |

| <b>DISCUSSION</b>         |    |                                                                                 |       |                       |
|---------------------------|----|---------------------------------------------------------------------------------|-------|-----------------------|
| Strengths and limitations | 9  | Provide a brief summary of the strengths and limitations of the evidence        | Page2 | Abstract/ Paragraph 3 |
| Interpretation            | 10 | Provide a general interpretation of the results and the important implications. | Page2 | Abstract/ Paragraph 3 |
| <b>OTHER</b>              |    |                                                                                 |       |                       |
| Funding                   | 11 | Indicate the primary source of funding for the review.                          | NA    | NA                    |
| Registration              | 12 | Provide the registration number and the registry name                           | Page2 | Registration          |

Adapted From: McInnes MDF, Moher D, Thoms BD, McGrath TA, Bossuyt PM, The PRISMA-DTA Group (2018). Preferred Reporting Items for a Systematic Review and Meta-analysis of Diagnostic Test Accuracy Studies: The PRISMA-DTA Statement. JAMA. 2018 Jan 23;319(4):388-396. doi: 10.1001/jama.2017.19163.

**Table S3. Search Strategy**

| PubMed                                                                                                                                                                                                                                                                                                                                                                                                              | EMBASE                                                                                                                                                                                                                                                                                                                                                                                                       | Cochrane Library                                                                                                                                                                                                                                                                                                                                                                                             |
|---------------------------------------------------------------------------------------------------------------------------------------------------------------------------------------------------------------------------------------------------------------------------------------------------------------------------------------------------------------------------------------------------------------------|--------------------------------------------------------------------------------------------------------------------------------------------------------------------------------------------------------------------------------------------------------------------------------------------------------------------------------------------------------------------------------------------------------------|--------------------------------------------------------------------------------------------------------------------------------------------------------------------------------------------------------------------------------------------------------------------------------------------------------------------------------------------------------------------------------------------------------------|
| <p>#1 “computed tomography” OR “CT” OR “cardiac CT”</p> <p>OR “echocardiography” OR “transesophageal echocardiography” OR “TEE” OR “imaging”</p> <p>#2 “left atrial”</p> <p>#3 “thrombus” OR “thrombosis”</p> <p>#4 “detection” OR “diagnosis” OR “assessment”</p> <p>#5 “cohort” OR “observational” OR “prospective” OR “retrospective” OR “trial” OR “epidemiology”</p> <p># 6 #1 AND #2 AND #3 AND #4 AND #5</p> | <p>#1 “computed tomography” OR “CT” OR “cardiac CT”</p> <p>OR “echocardiography” OR “transesophageal echocardiography” OR “TEE” OR “imaging”</p> <p>#2 “ left atrial thrombus” OR “left atrial thrombosis”</p> <p>#3 “detection” OR “diagnosis” OR “assessment”</p> <p>#4 “cohort” OR “observational” OR “prospective” OR “retrospective” OR “trial” OR “epidemiology”</p> <p>#5 1# AND #2 AND #3 AND #4</p> | <p>#1 “computed tomography” OR “CT” OR “cardiac CT”</p> <p>OR “echocardiography” OR “transesophageal echocardiography” OR “TEE” OR “imaging”</p> <p>#2 “ left atrial thrombus” OR “left atrial thrombosis”</p> <p>#3 “detection” OR “diagnosis” OR “assessment”</p> <p>#4 “cohort” OR “observational” OR “prospective” OR “retrospective” OR “trial” OR “epidemiology”</p> <p>#5 1# AND #2 AND #3 AND #4</p> |

**Table S4. Summary of QUADAS-2 Assessment of Included Studies**

| Study, Year      | Risk of Bias      |            |                    |                 | Applicability Concerns |            |                    |
|------------------|-------------------|------------|--------------------|-----------------|------------------------|------------|--------------------|
|                  | Patient Selection | Index Test | Reference Standard | Flow and Timing | Patient Selection      | Index Test | Reference Standard |
| Achenbach 2004   | Low               | Low        | Low                | Low             | Low                    | Low        | Low                |
| Kim 2007         | Low               | Low        | Low                | Low             | Low                    | Low        | Low                |
| Shapiro 2007     | Low               | Low        | Low                | High            | Low                    | Low        | Low                |
| Feuchtner 2008   | Low               | Low        | Unclear            | Low             | Low                    | Low        | Low                |
| Tang 2008        | Low               | Low        | Low                | Low             | Low                    | Low        | Low                |
| Hur 2008         | Low               | Low        | Unclear            | Low             | Low                    | Low        | Low                |
| Patel 2008       | Low               | Unclear    | Unclear            | Low             | Low                    | Low        | Low                |
| Martinez 2009    | Low               | Low        | Low                | Low             | Low                    | Low        | Low                |
| Hur 2009         | Low               | Low        | Unclear            | Low             | Low                    | Low        | Low                |
| Kim 2010         | Low               | Low        | Low                | Low             | Low                    | Low        | Low                |
| Kapa 2010        | Low               | Low        | Low                | Low             | Low                    | Low        | Low                |
| Maltagliati 2011 | Unclear           | Unclear    | Unclear            | Low             | Low                    | Low        | Low                |
| Hur 2011         | Low               | Low        | Unclear            | Low             | Low                    | Low        | Low                |
| Swait 2012       | Low               | Low        | Low                | Low             | Low                    | Low        | Low                |
| Hur 2013         | Low               | Low        | Low                | Low             | Low                    | Low        | Low                |
| Dorenkamp 2013   | Low               | Low        | Low                | Low             | Low                    | Low        | Low                |
| Budoff 2014      | Low               | Low        | Low                | Low             | Low                    | Low        | Low                |
| Hong 2014        | Low               | Low        | Unclear            | Low             | Low                    | Low        | Low                |
| Hosmi 2016       | Low               | Low        | Low                | Low             | Low                    | Low        | Low                |
| Lazoura 2016     | Low               | Low        | Low                | Low             | Low                    | Low        | Low                |
| Wang 2016        | Low               | Low        | Low                | Low             | Low                    | Low        | Low                |
| Kottmaier 2018   | Low               | Low        | Unclear            | Low             | Low                    | Low        | Low                |
| Kuronuma 2019    | Low               | Low        | Low                | Low             | Low                    | Low        | Low                |
| Li 2019          | Low               | Low        | Unclear            | Low             | Low                    | Low        | Low                |
| Spagnolo 2020    | Low               | Low        | Low                | Low             | Low                    | Low        | Low                |
| Guha 2020        | Low               | Low        | Low                | Low             | Low                    | Low        | Low                |
| Zhai 2017        | Low               | Low        | Low                | Low             | Low                    | Low        | Low                |

QUADAS-2: Quality Assessment of Diagnostic Accuracy Studies 2

Figure S1.

Univariable Meta-regression & Subgroup Analyses

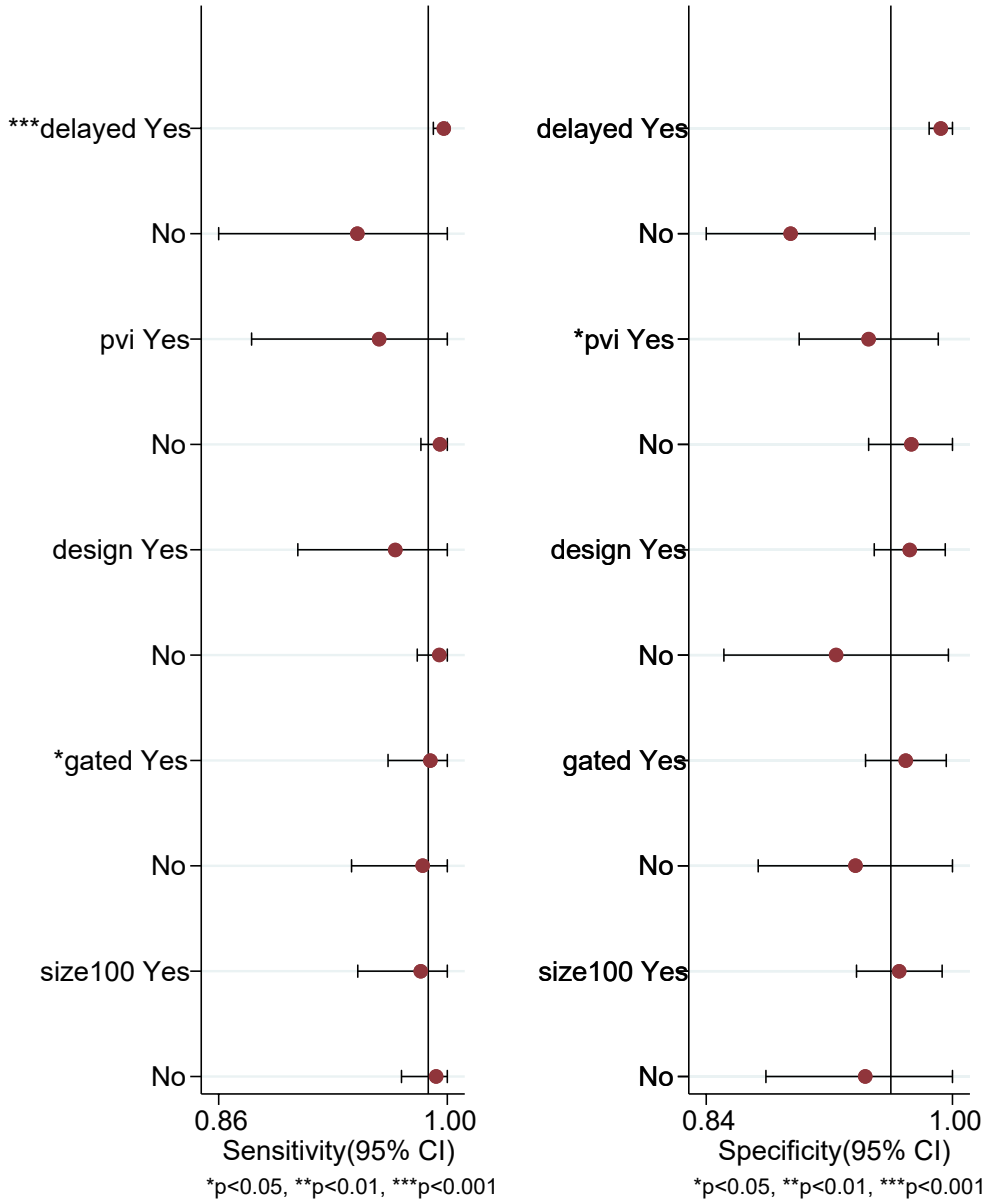



Figure S2.

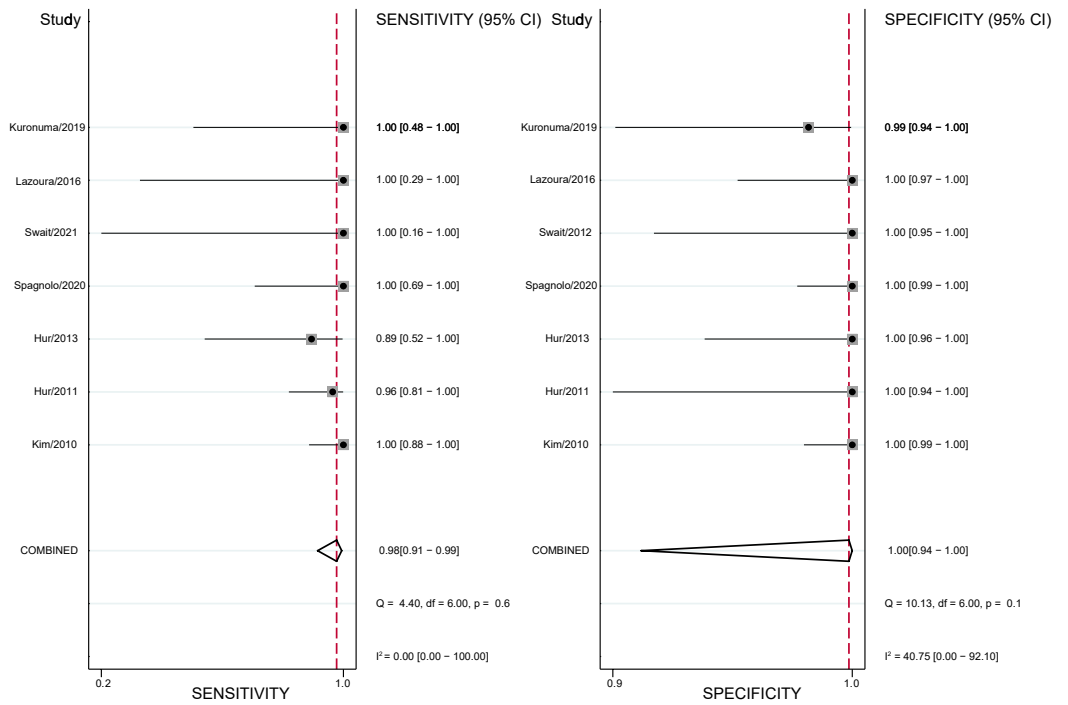

Supplement: JAH3-10-e022505-s001.pdf [file JAH3-10-e022505-s001.pdf]
